# Supplementary material for: Construction of lncRNA-miRNA-mRNA regulatory network and correlation between prognostic biomarker PDGFRB and immune infiltrates in stomach adenocarcinoma
Source: Research Square preprint supplement (doi:10.21203/rs.3.rs-1338495/v1), 2022-02-28
Supplement: Supplementary file 1 [file c9bc5a097cc8df84c008ed65.docx]

| Gene | miRNA | cor | pvalue | logFC | diffPval |
| --- | --- | --- | --- | --- | --- |
| PDGFRB | hsa-miR-106b-5p | -0.46195 | 0 | 1.499501 | 4.87E-17 |
| PDGFRB | hsa-miR-17-5p | -0.45257 | 0 | 1.744815 | 1.87E-16 |
| PDGFRB | hsa-miR-20a-5p | -0.44695 | 0 | 1.642563 | 4.31E-16 |
| PDGFRB | hsa-miR-93-5p | -0.42976 | 0 | 1.703421 | 2.33E-18 |
| PDGFRB | hsa-miR-18a-5p | -0.41603 | 0 | 2.202287 | 6.89E-17 |
| PDGFRB | hsa-miR-151a-5p | -0.40492 | 0 | 1.09998 | 1.14E-10 |
| PDGFRB | hsa-miR-30b-5p | -0.37827 | 5.29E-14 | 0.261855 | 0.042128 |
| PDGFRB | hsa-miR-30d-5p | -0.3643 | 5.57E-13 | 0.273813 | 0.009293 |
| PDGFRB | hsa-miR-30c-5p | -0.30829 | 1.52E-09 | -0.16268 | 0.027977 |
| PDGFRB | hsa-miR-106a-5p | -0.2865 | 2.14E-08 | 0.544553 | 0.028612 |
| PDGFRB | hsa-miR-421 | -0.27691 | 5.65E-08 | 0.832048 | 2.40E-11 |
| PDGFRB | hsa-miR-185-5p | -0.26776 | 1.76E-07 | 1.373558 | 3.38E-17 |
| PDGFRB | hsa-miR-338-3p | -0.26609 | 2.11E-07 | 0.151613 | 0.673271 |
| PDGFRB | hsa-miR-744-5p | -0.25171 | 9.52E-07 | 0.697583 | 3.68E-07 |
| PDGFRB | hsa-miR-30e-5p | -0.23508 | 4.88E-06 | -0.03022 | 0.747113 |
| PDGFRB | hsa-miR-486-5p | -0.23294 | 5.97E-06 | -1.27222 | 8.77E-08 |

Supplementary Table 1. All miRNAs showed negative correlations with target gene PDGFRB.
